# Supplementary material for: Characterization of a Listeria monocytogenes meningitis mouse model
Source: Springer Nature journal article supplement (doi:10.1186/s12974-018-1293-3), 2018-09-07

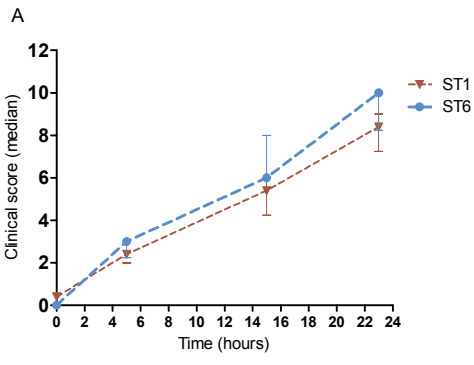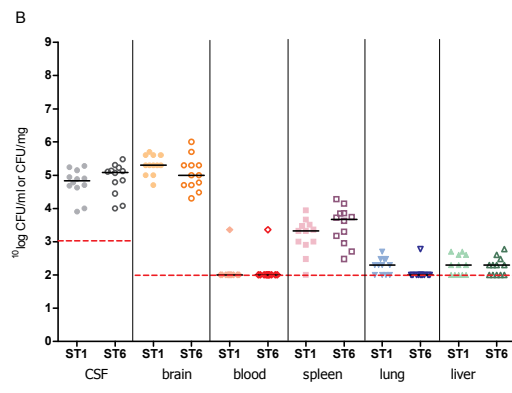

Supplement: MOESM6 [file 16106510]
